# Supplementary material for: Calcium, Phosphate, and Vitamin D in Children and Adolescents with Chronic Diseases: A Cross-Sectional Study
Source: MDPI journal article supplement (doi:10.3390/nu16091349), 2024-04-29
Supplement: s1 [file s1]

# Calcium, Phosphate, and Vitamin D in Children and Adolescents with Chronic Diseases: A cross-sectional study

Marlene Fabiola Escobedo-Monge <sup>1,\*</sup>, Pilar Bahillo-Curieses <sup>2</sup>, Joaquín Parodi-Román <sup>3</sup>, María Antonieta Escobedo-Monge <sup>4</sup>, Pedro Alonso López<sup>5</sup>, and José Manuel Marugán-Miguelsanz <sup>1,5</sup>

<sup>1</sup> Department of Pediatrics of the Faculty of Medicine, University of Valladolid, Avenida Ramón y Cajal, 7, 47005 Valladolid, Spain.

<sup>2</sup> Section of Pediatric Endocrinology, University Clinical Hospital of Valladolid, Avenida Ramón y Cajal, 7, 47005 Valladolid, Spain; pilarbahillo@yahoo.es

<sup>3</sup> Science Faculty, University of Cadiz, Paseo de Carlos III, 28, 11003 Cádiz; joaquin\_parodi@yahoo.es

<sup>4</sup> Department of Chemistry, Science Faculty, University of Burgos, Plaza Misael Bañuelos s/n, 09001 Burgos, Spain; antoitalia777@gmail.com

<sup>5</sup> Section of Gastroenterology and Pediatric Nutrition, University Clinical Hospital of Valladolid, Avenida Ramón y Cajal, 7, 47005 Valladolid, Spain; jmmarugan@telefonica.net; palonso@saludcastillayleon.es

\* Correspondence: amescobedo@msn.com; Tel.: +34-639-590-467

**Table S1.** Significant correlations between serum calcium intake, serum calcium, phosphorus, and calcium/phosphorus ratio with nutritional indicators in the whole series ( $n = 78$ ).

| Correlations                 | Serum Vitamin D |                | Calcium intake |                | Serum calcium |                | Serum phosphorus |                | Serum Ca/P ratio |                |
|------------------------------|-----------------|----------------|----------------|----------------|---------------|----------------|------------------|----------------|------------------|----------------|
|                              | <i>r</i>        | <i>p-value</i> | <i>r</i>       | <i>p-value</i> | <i>r</i>      | <i>p-value</i> | <i>r</i>         | <i>p-value</i> | <i>r</i>         | <i>p-value</i> |
| Age (years)                  | -0.292**        | 0.010          | -0.295**       | 0.009          | -0.368**      | 0.001          | -0.541**         | <0.001         | 0.464**          | <0.001         |
| Weight-for-age (kg)          | -0.286*         | 0.012          | -0.268*        | 0.018          | -0.379**      | <0.001         | -0.414**         | <0.001         | 0.314**          | 0.006          |
| Weight-for-age Z-score       | -0.290*         | 0.011          | -0.264*        | 0.020          | -0.279*       | 0.015          |                  |                |                  |                |
| Height-for-age (cm)          | -0.303**        | 0.007          | -0.272*        | 0.017          | -0.405**      | <0.001         | -0.439**         | <0.001         | 0.321**          | 0.005          |
| Age-for-50°Height            | -0.273*         | 0.016          |                |                | -0.368**      | 0.001          | -0.404**         | <0.001         | 0.298**          | 0.009          |
| Weight-for-Height Z-score    | -0.296**        | 0.009          |                |                | -0.259*       | 0.024          |                  |                |                  |                |
| Cephalic circumference (cm)  | -0.299**        | 0.008          |                |                | -0.453**      | <0.001         | -0.381**         | <0.001         | 0.236*           | 0.040          |
| Wrist circumference (cm)     | -0.303**        | 0.009          |                |                | -0.290*       | 0.013          |                  |                |                  |                |
| Waist circumference (cm)     | -0.300**        | 0.010          |                |                | -0.290*       | 0.013          | -0.318**         | 0.006          | 0.250*           | 0.034          |
| Waist circumference Z-s      | -0.279*         | 0.017          |                |                | -0.280*       | 0.017          |                  |                |                  |                |
| Hip circumference (cm)       | -0.312**        | 0.007          | -0.291*        | 0.012          | -0.315**      | 0.007          | -0.396**         | <0.001         | 0.317**          | 0.006          |
| Hip circumference Z-score    | -0.283*         | 0.015          |                |                | -0.279*       | 0.017          |                  |                |                  |                |
| MUAC (cm)                    | -0.258*         | 0.023          |                |                | -0.334**      | 0.003          | -0.271*          | 0.018          |                  |                |
| MUAC Z-score                 | -0.256*         | 0.025          |                |                | -0.263*       | 0.022          |                  |                |                  |                |
| Bicipital skinfold Z-score   | -0.267*         | 0.019          |                |                |               |                |                  |                |                  |                |
| Triceps skinfold Z-score     |                 |                | -0.239*        | 0.036          |               |                | -0.307**         | 0.007          | 0.280*           | 0.014          |
| Subscapular skinfold Z-score | -0.264*         | 0.020          |                |                |               |                |                  |                |                  |                |
| Sum of skinfolds (mm)        | -0.259*         | 0.023          |                |                |               |                |                  |                |                  |                |
| Body mass index              | -0.257*         | 0.024          |                |                | -0.277*       | 0.015          | -0.280*          | 0.014          |                  |                |
| Body mass index Z-score      | -0.264*         | 0.020          |                |                |               |                |                  |                |                  |                |
| Nutritional index            | -0.260*         | 0.022          |                |                | -0.255*       | 0.026          |                  |                |                  |                |
| Waterlow I (%)               | -0.247*         | 0.030          |                |                | -0.237*       | 0.039          |                  |                |                  |                |
| Waterlow II (%)              | -0.229*         | 0.045          |                |                | -0.267*       | 0.020          |                  |                |                  |                |
| Body fat percentage          | -0.281*         | 0.013          | -0.259*        | 0.023          | -0.243*       | 0.035          | -0.268*          | 0.019          |                  |                |
| Fat mass index               | -0.272*         | 0.017          | -0.228*        | 0.046          | -0.254*       | 0.027          | -0.278*          | 0.015          |                  |                |
| Fat free mass index          | -0.227*         | 0.047          |                |                | -0.288*       | 0.012          | -0.252*          | 0.028          |                  |                |
| Fat mass by A                | -0.281*         | 0.013          | -0.259*        | 0.023          | -0.242*       | 0.035          | -0.268*          | 0.019          |                  |                |
| Fat mass kg by A             | -0.267*         | 0.019          | -0.265*        | 0.020          | -0.313**      | 0.006          | -0.360**         | 0.001          | 0.288*           | 0.012          |
| Fat free mass by A           | 0.281*          | 0.013          | 0.259*         | 0.023          | 0.242*        | 0.035          | 0.268*           | 0.019          |                  |                |
| Fat free mass kg by A        | -0.282*         | 0.013          | -0.254*        | 0.026          | -0.404**      | <0.001         | -0.428**         | <0.001         | 0.313**          | 0.006          |
| Fat mass by BIA              | -0.279*         | 0.019          | -0.313**       | 0.008          | -0.301*       | 0.012          | -0.351*          | 0.003          | 0.304*           | 0.011          |
| Fat free mass by BIA         | -0.300*         | 0.012          |                |                |               |                | -0.326**         | 0.006          |                  |                |

|                                     |         |       |         |        |          |        |          |        |          |        |
|-------------------------------------|---------|-------|---------|--------|----------|--------|----------|--------|----------|--------|
| Far free mass kg by BIA             | -0.289* | 0.044 |         |        |          |        | -0.380** | 0.008  | 0.303*   | 0.037  |
| Arm area                            | -0.276* | 0.016 |         |        | -0.304** | 0.008  | -0.335** | 0.003  | 0.265*   | 0.021  |
| Arm muscle area                     | -0.243* | 0.033 |         |        | -0.360** | 0.001  | -0.305** | 0.007  |          |        |
| Arm fat area                        | -0.272* | 0.017 |         |        | -0.234*  | 0.042  | -0.333** | 0.003  | 0.300**  | 0.008  |
| MUAC                                |         |       |         |        |          |        | -0.290*  | 0.011  | 0.355**  | 0.002  |
| Muscle area/Fat area index          | -0.267* | 0.019 | -0.228* | 0.046  |          |        | -0.269*  | 0.019  | 0.275*   | 0.016  |
| Muscle fat coefficient              |         |       | -0.234* | 0.041  |          |        | -0.240*  | 0.037  | 0.242*   | 0.035  |
| Energy expenditure                  | -0.299* | 0.041 |         |        | -0.404** | 0.006  | -0.349*  | 0.019  |          |        |
| TTSPA                               |         |       |         |        |          |        | -0.321*  | 0.012  | 0.310*   | 0.015  |
| Kilocalories (%DRI)                 |         |       | 0.379** | <0.001 | -0.332** | 0.004  |          |        | -0.234*  | 0.044  |
| Protein (%DRI)                      |         |       | 0.349** | 0.002  |          |        | 0.330**  | 0.004  | -0.379** | <0.001 |
| Fiber (%DRI)                        |         |       |         |        | -0.277*  | 0.016  | -0.271*  | 0.019  |          |        |
| Cholesterol (%DRI)                  |         |       |         |        |          |        | -0.239*  | 0.039  |          |        |
| Vitamin B2 (%DRI)                   | 0.266*  | 0.020 |         |        | 0.250*   | 0.030  |          |        |          |        |
| Vitamin B6 (%DRI)                   | 0.255*  | 0.026 |         |        |          |        |          |        |          |        |
| Calcium (%DRI)                      |         |       |         |        |          |        | 0.241*   | 0.038  |          |        |
| Magnesium (%DRI)                    |         |       | 0.370** | <0.001 |          |        | 0.266*   | 0.021  | -0.244*  | 0.035  |
| Ca/Mg intake ratio                  |         |       | 0.538** | <0.001 |          |        |          |        |          |        |
| Zinc (%DRI)                         |         |       |         |        |          |        |          |        | -0.282*  | 0.014  |
| Iron (%DRI)                         |         |       | 0.347** | 0.002  |          |        |          |        |          |        |
| Beta carotene (µg/L)                |         |       |         |        |          |        | 0.260*   | 0.025  |          |        |
| Folic acid (mg/mL)                  | 0.243*  | 0.037 |         |        |          |        |          |        |          |        |
| Serum vitamin B12 (pg/dL)           |         |       | 0.438** | <0.001 |          |        |          |        |          |        |
| Serum vitamin C (mg/L)              | 0.332** | 0.005 |         |        | 0.238*   | 0.049  |          |        |          |        |
| Serum Ca/P ratio                    |         |       |         |        |          |        | -0.923** | <0.001 |          |        |
| Serum calcium (mg/dL)               |         |       |         |        |          |        | 0.492**  | <0.001 |          |        |
| Serum phosphorus (mg/dL)            |         |       | 0.241*  | 0.038  | 0.492**  | <0.001 |          |        | -0.923** | <0.001 |
| Serum copper (µg/dL)                |         |       |         |        |          |        | 0.285*   | 0.013  | -0.255*  | 0.026  |
| Serum copper/zinc ratio             |         |       |         |        |          |        | 0.226*   | 0.050  |          |        |
| Serum magnesium (mg/dL)             | 0.274*  | 0.019 |         |        |          |        |          |        |          |        |
| Serum Ca/Mg ratio                   |         |       |         |        | 0.319**  | 0.006  |          |        |          |        |
| Serum Mg/Ca ratio                   |         |       |         |        | -0.344*  | 0.033  |          |        |          |        |
| Transferrin (mg/dL)                 |         |       |         |        | 0.230*   | 0.049  |          |        |          |        |
| Ferritin (ng/mL)                    |         |       |         |        | -0.306** | 0.008  |          |        |          |        |
| Glucose (mg/dL)                     |         |       |         |        | -0.304** | 0.008  | -0.303** | 0.008  | 0.256*   | 0.026  |
| Creatinine (mg/dL)                  |         |       |         |        | -0.327** | 0.004  | -0.428** | <0.001 | 0.343**  | 0.002  |
| Total protein                       |         |       |         |        | 0.345**  | 0.002  |          |        |          |        |
| Albumin (mg/dL)                     |         |       |         |        | 0.294*   | 0.014  |          |        |          |        |
| Triglycerides (mg/dL)               | 0.332** | 0.003 |         |        |          |        |          |        |          |        |
| Total bilirubin (mg/dL)             |         |       |         |        |          |        | -0.257*  | 0.034  |          |        |
| AST (U/L)                           | 0.305*  | 0.011 |         |        | 0.310*   | 0.010  | 0.424**  | <0.001 | 0.346**  | 0.004  |
| ALT (U/L)                           |         |       |         |        | -0.275*  | 0.023  |          |        |          |        |
| MCV (µg/m <sup>3</sup> )            |         |       |         |        | -0.256*  | 0.026  |          |        |          |        |
| Leucocytes (cell/mm <sup>3</sup> )  | 0.284*  | 0.012 | 0.301** | 0.008  | 0.379**  | <0.001 | 0.407**  | <0.001 | -0.297** | 0.009  |
| Lymphocytes (cell/mm <sup>3</sup> ) |         |       | 0.353** | 0.002  | 0.459**  | <0.001 | 0.459**  | <0.001 | -0.316** | 0.005  |
| Platelets (cell/mm <sup>3</sup> )   |         |       |         |        | 0.250*   | 0.029  | 0.363**  | 0.001  | -0.278*  | 0.015  |
| IgG3 (mg/dL)                        | 0.303*  | 0.021 |         |        |          |        |          |        |          |        |
| IgA (mg/dL)                         |         |       |         |        |          |        | -0.276*  | 0.027  |          |        |
| CD16+56 T-lymphocytes               |         |       | -0.314* | 0.011  |          |        |          |        |          |        |
| IGF-1 (ng/mL)                       |         |       | -0.228* | 0.050  |          |        | -0.287*  | 0.012  |          |        |
| Disease duration                    |         |       |         |        |          |        |          |        | 0.233*   | 0.043  |

Legend: Ca: calcium. P: phosphorus. A: anthropometry. BIA: bioelectric impedance analysis. MUAC: mid upper-arm circumference. MAMC: mid arm muscle circumference. %DRI: dietary reference intake. Mg: magnesium. AST: aspartate aminotransferase. ALT: alanine aminotransferase. MCV: Mean corpuscular volume. IGF-1: insulin-like growth factor-1. \*  $p < 0.05$  \*\*  $p < 0.01$  (2 tailed).

**Table S2.** Correlations between serum vitamin D, serum calcium, dietary calcium intake, serum phosphorus and serum calcium/phosphorus ratio with nutritional indicators by body mass index groups ( $n = 78$ ), \*\*  $p < 0.01$  (2 tailed).

|                                                        | Serum Vitamin D |                | Serum Calcium |                |
|--------------------------------------------------------|-----------------|----------------|---------------|----------------|
|                                                        | <i>r</i>        | <i>p-value</i> | <i>r</i>      | <i>p-value</i> |
| <b>Obese</b>                                           |                 |                |               |                |
| Waist/hip ratio                                        | -0.543**        | 0.009          |               |                |
| Ferritin (ng/mL)                                       | -0.552**        | 0.006          |               |                |
| CD8 T-Lymphocytes                                      |                 |                | 0.610**       | 0.009          |
| <b>Undernutrition</b>                                  |                 |                |               |                |
| Serum phosphate (mg/dL)                                |                 |                | 0.618**       | <0.001         |
| Transferrin (mg/dL)                                    |                 |                | 0.483**       | 0.008          |
| Medium corpuscular volume ( $\mu\text{g}/\text{m}^3$ ) |                 |                | -0.487**      | 0.006          |
| CD16+56 T Lymphocytes                                  | -0.515**        | 0.007          |               |                |
| <b>Eutrophic</b>                                       |                 |                |               |                |
| Height-for-age Z-score                                 | -0.585**        | 0.003          |               |                |
| Waterlow II (%)                                        | -0.606**        | 0.002          |               |                |
| Insulin-like growth factor-binding protein-3 (mg/L)    | -0.592**        | 0.003          |               |                |
| Complement C3                                          |                 |                | 0.596**       | 0.006          |

  

|                                                 | Calcium  | Intake         | Serum    | P              | Serum    | Ca/P r         |
|-------------------------------------------------|----------|----------------|----------|----------------|----------|----------------|
|                                                 | <i>r</i> | <i>p-value</i> | <i>r</i> | <i>p-value</i> | <i>r</i> | <i>p-value</i> |
| <b>Obese</b>                                    |          |                |          |                |          |                |
| Age (years)                                     |          |                | -0.699** | <0.001         | 0.636**  | 0.001          |
| Weight-for-age (kg)                             |          |                | -0.606** | 0.002          |          |                |
| Height-for-age (cm)                             |          |                | -0.595** | 0.003          |          |                |
| Head circumference (cm)                         |          |                | -0.563** | 0.005          |          |                |
| Waist circumference (cm)                        |          |                | -0.583** | 0.006          | 0.566**  | 0.008          |
| Hip circumference (cm)                          |          |                | -0.667** | <0.001         | 0.620**  | 0.002          |
| Suprailiac skinfold (mm)                        |          |                |          |                | 0.528**  | 0.010          |
| Triceps skinfold (mm)                           |          |                |          |                | 0.592**  | 0.003          |
| Mid upper-arm circumference (cm)                |          |                | -0.557** | 0.006          |          |                |
| Fat mass kg Anthropometry                       |          |                | -0.632** | 0.001          | 0.576**  | 0.004          |
| Fat free mass kg Anthropometry                  |          |                | -0.641** | <0.001         |          |                |
| Fat mass Bioelectric Impedance Analysis         | -0.587** | 0.003          | -0.701** | <0.001         | 0.659**  | <0.001         |
| Fat mass kg Bioelectric Impedance Analysis      | -0.705** | <0.001         | -0.584** | 0.007          | 0.670**  | 0.001          |
| Fat free mass Bioelectric Impedance Analysis    |          |                | -0.559** | 0.006          |          |                |
| Fat free mass kg Bioelectric Impedance Analysis |          |                | -0.594** | 0.006          |          |                |
| Arm area                                        |          |                | -0.544** | 0.007          |          |                |
| Fat area arm                                    |          |                | -0.572** | 0.004          | 0.604**  | 0.002          |
| Mid arm muscle circumference                    |          |                | -0.579** | 0.004          |          |                |
| Body mass index                                 |          |                | -0.539** | 0.008          |          |                |
| Fat mass index                                  |          |                | -0.485*  | 0.019          | 0.450*   | 0.031          |
| Fat free mass index                             |          |                | -0.498*  | 0.016          |          |                |
| Vitamin B12 (%Dietary Reference Intake)         | 0.608**  | 0.002          |          |                |          |                |
| Magnesium (%Dietary Reference Intake)           | 0.585**  | 0.003          | 0.633**  | 0.001          | -0.596** | 0.003          |
| Iron (%Dietary Reference Intake)                | 0.698**  | <0.001         |          |                | -0.548** | 0.007          |
| Zinc (%Dietary Reference Intake)                |          |                | 0.565**  | 0.005          | -0.646** | <0.001         |
| Beta-carotene ( $\mu\text{g}/\text{L}$ )        |          |                | 0.527**  | 0.010          |          |                |
| Copper ( $\mu\text{g}/\text{dL}$ )              |          |                | 0.729**  | <0.001         | -0.612** | 0.002          |
| Serum Calcium/Phosphorus ratio                  |          |                | -0.913** | <0.001         |          |                |
| Serum Copper/Zinc ratio                         |          |                | 0.590**  | 0.003          | -0.576** | 0.004          |
| Serum Zinc/Copper ratio                         |          |                | -0.594** | 0.003          | 0.578**  | 0.004          |
| Prealbumin (mg/dL)                              |          |                | -0.555** | 0.009          |          |                |
| Creatinine (mg/dL)                              |          |                | -0.706** | <0.001         | 0.642**  | <0.001         |
| Leucocytes ( $\text{cell}/\text{mm}^3$ )        | 0.573**  | 0.003          |          |                |          |                |
| Lymphocytes ( $\text{cell}/\text{mm}^3$ )       | 0.560**  | 0.004          |          |                |          |                |
| <b>Undernutrition</b>                           |          |                |          |                |          |                |
| Age (years)                                     | -0.369*  | 0.045          | -0.476** | 0.008          | 0.401*   | 0.028          |
| Arm fat area                                    |          |                | -0.495** | 0.005          | 0.500**  | 0.005          |
| Body mass index Z-score                         | 0.535**  | 0.003          |          |                |          |                |

|                                           |          |        |          |        |          |       |
|-------------------------------------------|----------|--------|----------|--------|----------|-------|
| Body fat percentage                       |          |        | -0.429*  | 0.018  | 0.434*   | 0.016 |
| Fat mass index                            |          |        | -0.395*  | 0.031  | 0.381*   | 0.038 |
| Kilocalories (%Dietary Reference Intake)  | 0.527**  | 0.003  |          |        |          |       |
| Protein (%Dietary Reference Intake)       | 0.535**  | 0.003  |          |        | -0.551** | 0.002 |
| Carbohydrates (%Dietary Reference Intake) | 0.537**  | 0.003  |          |        |          |       |
| Vitamin A (%Dietary Reference Intake)     | 0.484**  | 0.008  | 0.522**  | 0.004  | 0.521**  | 0.004 |
| Magnesium (%Dietary Reference Intake)     | 0.478**  | 0.009  |          |        |          |       |
| Iron (%Dietary Reference Intake)          | 0.596**  | <0.001 |          |        |          |       |
| Iodine (%Dietary Reference Intake)        | 0.544**  | 0.002  |          |        |          |       |
| Serum phosphate (mg/dL)                   | 0.500**  | 0.006  |          |        |          |       |
| Serum Calcium/Phosphorus ratio            | -0.477** | 0.009  | -0.909** | <0.001 |          |       |
| Leucocytes (cell/mm <sup>3</sup> )        |          |        | 0.475**  | 0.008  | -0.481** | 0.007 |
| Lymphocytes (cell/mm <sup>3</sup> )       |          |        | 0.523**  | 0.003  | -0.484** | 0.007 |
| <b>Eutrophic</b>                          |          |        |          |        |          |       |
| Age (years)                               |          |        | -0.432*  | 0.026  | 0.423*   | 0.044 |
| Fat mass kg BIA                           |          |        |          |        | 0.581**  | 0.009 |
| Fat mass index                            |          |        | -0.456*  | 0.029  | 0.458*   | 0.028 |
| Fat free mass index                       |          |        | -0.575** | 0.004  | 0.555**  | 0.006 |
| Carbohydrates (%Dietary Reference Intake) |          |        | 0.562**  | 0.005  |          |       |
| Serum Calcium/Phosphorus ratio            |          |        | -0.945** | <0.001 |          |       |
| Albumin (mg/dL)                           | -0.564** | 0.005  |          |        |          |       |
| Aspartate aminotransferase (U/L)          |          |        | 0.567**  | 0.006  | -0.538** | 0.010 |
| Monocyte (%)                              |          |        | 0.556**  | 0.006  |          |       |

**Table S3.** Regression analysis between serum and dietary calcium and vitamin D intake, serum phosphorus, serum calcium/phosphorus ratio and nutritional parameters by body mass index groups ( $n = 78$ ).

| Obesity (n = 24)                                                                                                                                                                                                                 |                                                                                                                                                                                                                                                                            | Undernutrition (n= 30)                                                                                                                                                                                                                                                                                             |                                                                                                                                                                                                                                                                                                                     | Eutrophic (n = 24)                                                                                                                                                                                                                                |                                                                                                                                                                                                                                                                                                                                   |
|----------------------------------------------------------------------------------------------------------------------------------------------------------------------------------------------------------------------------------|----------------------------------------------------------------------------------------------------------------------------------------------------------------------------------------------------------------------------------------------------------------------------|--------------------------------------------------------------------------------------------------------------------------------------------------------------------------------------------------------------------------------------------------------------------------------------------------------------------|---------------------------------------------------------------------------------------------------------------------------------------------------------------------------------------------------------------------------------------------------------------------------------------------------------------------|---------------------------------------------------------------------------------------------------------------------------------------------------------------------------------------------------------------------------------------------------|-----------------------------------------------------------------------------------------------------------------------------------------------------------------------------------------------------------------------------------------------------------------------------------------------------------------------------------|
| Serum vitamin D                                                                                                                                                                                                                  | Vitamin D intake                                                                                                                                                                                                                                                           | Serum vitamin D                                                                                                                                                                                                                                                                                                    | Vitamin D intake                                                                                                                                                                                                                                                                                                    | Serum vitamin D                                                                                                                                                                                                                                   | Vitamin D intake                                                                                                                                                                                                                                                                                                                  |
| <i>Linear</i>                                                                                                                                                                                                                    | <i>Regression</i>                                                                                                                                                                                                                                                          | <i>Analysis</i>                                                                                                                                                                                                                                                                                                    |                                                                                                                                                                                                                                                                                                                     |                                                                                                                                                                                                                                                   |                                                                                                                                                                                                                                                                                                                                   |
| Waist/hip ratio<br>$R^2 = 0.317, p = 0.008$<br>Serum vitamin C<br>$R^2 = 0.247, p = 0.016$                                                                                                                                       |                                                                                                                                                                                                                                                                            | FFM kg BIA<br>$R^2 = 0.600, p = 0.024$<br>Serum vitamin C<br>$R^2 = 0.183, p = 0.037$<br>Triglycerides<br>$R^2 = 0.345, p = 0.001$                                                                                                                                                                                 |                                                                                                                                                                                                                                                                                                                     | Height-for-age Z-s<br>$R^2 = 0.273, p = 0.011$<br>Waterlow II<br>$R^2 = 0.316, p = 0.005$<br>Serum magnesium<br>$R^2 = 0.271, p = 0.022$<br>IGFBP3<br>$R^2 = 0.247, p = 0.016$                                                                    |                                                                                                                                                                                                                                                                                                                                   |
| <i>Multilinear</i>                                                                                                                                                                                                               | <i>Regression</i>                                                                                                                                                                                                                                                          | <i>Analysis</i>                                                                                                                                                                                                                                                                                                    |                                                                                                                                                                                                                                                                                                                     |                                                                                                                                                                                                                                                   |                                                                                                                                                                                                                                                                                                                                   |
|                                                                                                                                                                                                                                  |                                                                                                                                                                                                                                                                            | IgG3 and CD16+56<br>T-lymphocytes<br>$R^2 = 0.629, p = < 0.001$                                                                                                                                                                                                                                                    |                                                                                                                                                                                                                                                                                                                     |                                                                                                                                                                                                                                                   |                                                                                                                                                                                                                                                                                                                                   |
| Serum calcium                                                                                                                                                                                                                    | Calcium intake                                                                                                                                                                                                                                                             | Serum calcium                                                                                                                                                                                                                                                                                                      | Calcium intake                                                                                                                                                                                                                                                                                                      | Serum calcium                                                                                                                                                                                                                                     | Calcium intake                                                                                                                                                                                                                                                                                                                    |
| <i>Linear</i>                                                                                                                                                                                                                    | <i>Regression</i>                                                                                                                                                                                                                                                          | <i>Analysis</i>                                                                                                                                                                                                                                                                                                    |                                                                                                                                                                                                                                                                                                                     |                                                                                                                                                                                                                                                   |                                                                                                                                                                                                                                                                                                                                   |
| MAMC<br>$R^2 = 0.216, p = 0.026$                                                                                                                                                                                                 | FM by BIA<br>$R^2 = 0.375, p = 0.003$                                                                                                                                                                                                                                      | Transferrin<br>$R^2 = 0.218, p = 0.016$                                                                                                                                                                                                                                                                            | FA/MA index<br>$R^2 = 0.254, p = 0.017$                                                                                                                                                                                                                                                                             | Head circumference<br>$R^2 = 0.182, p = 0.042$                                                                                                                                                                                                    | Hip circumference<br>$R^2 = 0.173, p = 0.043$<br>Albumin<br>$R^2 = 0.219, p = 0.024$<br>Serum vitamin B12<br>$R^2 = 0.213, p = 0.030$<br>Complement C3<br>$R^2 = 0.199, p = 0.049$                                                                                                                                                |
| Serum Mg/Ca ratio<br>$R^2 = 0.317, p = 0.005$                                                                                                                                                                                    | Serum vitamin B12<br>$R^2 = 0.271, p = 0.011$                                                                                                                                                                                                                              |                                                                                                                                                                                                                                                                                                                    | Lymphocytes<br>$R^2 = 0.229, p = 0.016$                                                                                                                                                                                                                                                                             |                                                                                                                                                                                                                                                   |                                                                                                                                                                                                                                                                                                                                   |
| <i>Multilinear</i>                                                                                                                                                                                                               | <i>Regression</i>                                                                                                                                                                                                                                                          | <i>Analysis</i>                                                                                                                                                                                                                                                                                                    |                                                                                                                                                                                                                                                                                                                     |                                                                                                                                                                                                                                                   |                                                                                                                                                                                                                                                                                                                                   |
|                                                                                                                                                                                                                                  | Mg, and Ca/Mg ratio (%DRI)<br>$R^2 = 0.795, p = < 0.001$                                                                                                                                                                                                                   | Serum phosphorus and Mg/Ca ratio<br>$R^2 = 0.590, p = < 0.001$                                                                                                                                                                                                                                                     | BMI Z-score and FMI<br>$R^2 = 0.288, p = 0.012$<br>Iron, Mg and Ca/Mg ratio (%DRI)<br>$R^2 = 0.835, p = < 0.001$                                                                                                                                                                                                    | Glucose and creatinine<br>$R^2 = 0.440, p = 0.005$                                                                                                                                                                                                | Mg, and Ca/Mg ratio (%DRI)<br>$R^2 = 0.869, p = < 0.001$<br>CD16+56<br>T-lymphocytes and leucocytes<br>$R^2 = 0.473, p = 0.002$                                                                                                                                                                                                   |
| CD8 T-Lymphocytes and lymphocytes<br>$R^2 = 0.664, p = 0.001$                                                                                                                                                                    |                                                                                                                                                                                                                                                                            | CD8 T-Lymphocytes and MCV<br>$R^2 = 0.480, p = 0.001$                                                                                                                                                                                                                                                              | Serum phosphorus and vitamin B12<br>$R^2 = 0.324, p = 0.006$                                                                                                                                                                                                                                                        |                                                                                                                                                                                                                                                   |                                                                                                                                                                                                                                                                                                                                   |
| Serum phosphorus                                                                                                                                                                                                                 | Serum Ca/P ratio                                                                                                                                                                                                                                                           | Serum phosphorus                                                                                                                                                                                                                                                                                                   | Serum Ca/P ratio                                                                                                                                                                                                                                                                                                    | Serum phosphorus                                                                                                                                                                                                                                  | Serum Ca/P ratio                                                                                                                                                                                                                                                                                                                  |
| <i>Linear</i>                                                                                                                                                                                                                    | <i>Regression</i>                                                                                                                                                                                                                                                          | <i>Analysis</i>                                                                                                                                                                                                                                                                                                    |                                                                                                                                                                                                                                                                                                                     |                                                                                                                                                                                                                                                   |                                                                                                                                                                                                                                                                                                                                   |
| Age (years)<br>$R^2 = 0.699, p = < 0.001$<br>Hip circumference<br>$R^2 = 0.422, p = 0.001$<br>Body mass index<br>$R^2 = 0.312, p = 0.006$<br>Energy expenditure<br>$R^2 = 0.255, p = 0.023$<br>IGF-1<br>$R^2 = 0.214, p = 0.026$ | Age (years)<br>$R^2 = 0.636, p = 0.001$<br>Hip circumference<br>$R^2 = 0.304, p = 0.010$<br>Fat mass index<br>$R^2 = 0.202, p = 0.031$<br>MAMC<br>$R^2 = 0.396, p = 0.003$<br>Serum phosphorus<br>$R^2 = 0.853, p = < 0.001$<br>Protein (%DRI)<br>$R^2 = 0.272, p = 0.011$ | Age (years)<br>$R^2 = 0.401, p = 0.028$<br>Head circumference<br>$R^2 = 0.171, p = 0.029$<br>Body fat percentage<br>$R^2 = 0.184, p = 0.018$<br>Arm area<br>$R^2 = 0.523, p = 0.043$<br>Vitamin A (%DRI)<br>$R^2 = 0.242, p = 0.007$<br>AST<br>$R^2 = 0.159, p = 0.044$<br>Lymphocytes<br>$R^2 = 0.290, p = 0.005$ | Age (years)<br>$R^2 = 0.699, p = < 0.001$<br>Body fat percentage<br>$R^2 = 0.189, p = 0.016$<br>TTSPA<br>$R^2 = 0.204, p = 0.040$<br>Leucocytes<br>$R^2 = 0.600, p = 0.024$<br>Serum phosphorus<br>$R^2 = 0.200, p = 0.008$<br>Protein (%DRI)<br>$R^2 = 0.215, p = 0.011$<br>Creatinine<br>$R^2 = 0.170, p = 0.029$ | Age (years)<br>$R^2 = 0.462, p = 0.026$<br>Carbohydrates (%DRI)<br>$R^2 = 0.354, p = 0.003$<br>Glucose<br>$R^2 = 0.358, p = 0.004$<br>Monocytes<br>$R^2 = 0.280, p = 0.016$                                                                       | Age (years)<br>$R^2 = 0.423, p = 0.044$<br>Triceps Z-score<br>$R^2 = 0.331, p = 0.004$<br>Fat free mass index<br>$R^2 = 0.308, p = 0.006$<br>Arm fat area<br>$R^2 = 0.414, p = 0.004$<br>Serum phosphorus<br>$R^2 = 0.890, p = < 0.001$<br>Kilocalories (%DRI)<br>$R^2 = 0.245, p = 0.016$<br>Glucose<br>$R^2 = 0.296, p = 0.009$ |
| <i>Multilinear</i>                                                                                                                                                                                                               | <i>Regression</i>                                                                                                                                                                                                                                                          | <i>Analysis</i>                                                                                                                                                                                                                                                                                                    |                                                                                                                                                                                                                                                                                                                     |                                                                                                                                                                                                                                                   |                                                                                                                                                                                                                                                                                                                                   |
| FFM by A, MAMC<br>$R^2 = 0.438, p = 0.007$                                                                                                                                                                                       |                                                                                                                                                                                                                                                                            |                                                                                                                                                                                                                                                                                                                    |                                                                                                                                                                                                                                                                                                                     | WA and HA<br>$R^2 = 0.417, p = 0.005$<br>BMI and BF%<br>$R^2 = 0.547, p = < 0.001$<br>AFA and FFM by A<br>$R^2 = 0.500, p = 0.006$<br>Serum Ca/P ratio and calcium<br>$R^2 = 0.988, p = < 0.001$<br>MCV and monocytes<br>$R^2 = 0.467, p = 0.016$ |                                                                                                                                                                                                                                                                                                                                   |
| Mg and fiber (%DRI)<br>$R^2 = 0.470, p = 0.002$<br>Serum Ca/P ratio and calcium<br>$R^2 = 0.985, p = < 0.001$                                                                                                                    |                                                                                                                                                                                                                                                                            | Serum Ca/P ratio and calcium<br>$R^2 = 0.978, p = < 0.001$                                                                                                                                                                                                                                                         |                                                                                                                                                                                                                                                                                                                     |                                                                                                                                                                                                                                                   |                                                                                                                                                                                                                                                                                                                                   |

Legend: FFM: fat free mass. FM: fat mass. BIA: bioelectrical impedance analysis. Z-s: Z-score. IGFBP3: insulin-like growth factor-binding protein 3. Ig: immunoglobulin. MAMC: mid arm muscle circumference. FA: fat area. MA: muscle area. Mg: magnesium. Ca: calcium. P: phosphorus. BMI: Body mass index. FMI: fat mass index. DRI: Dietary Reference Intake. MCV: Mean corpuscular volume. TTSPA: Total time spent on physical activity. IGF-1: insulin-like growth factor-1. AST: Aspartate aminotransferase. WA: weight-for-age. HA: height-for-age. BF%: body fat percentage. AFA: arm fat area.
